# Supplementary material
Source: publisher figshare collection journal article supplement (https://acs.figshare.com/ndownloader/files/5668671)
Supplement: Supplementary file 1 [file 5668671]

## DEDUCTION OF EQUATIONS

### 1. Basic formulae

To deduce the equations in our present paper, we used the following basic formulae of statistics. Here,  $E$  and  $V$  represent expectation and variance, respectively.  $X$  and  $Y$  are independent probability variables, and  $a$  is a constant.

Basic properties of expectation.

$$E(a \cdot X) = a \cdot E(X) \quad (\text{A1})$$

$$E(X+Y) = E(X) + E(Y) \quad (\text{A2})$$

$$E(X \cdot Y) = E(X) \cdot E(Y) \quad (\text{A3})$$

Basic properties of variance.

$$V(a \cdot X) = a^2 \cdot V(X) \quad (\text{A4})$$

$$V(X \pm Y) = V(X) + V(Y) \quad (\text{A5})$$

Definition of expectation and variance for an infinite population.

$$E(X) = \frac{1}{n} \cdot \sum_{i=1}^n X_i = \mu_{\text{inf}} \quad (\text{A6})$$

$$V(X) = \frac{1}{n-1} \cdot \sum_{i=1}^n (X_i - \mu_{\text{inf}})^2 = \sigma_{\text{inf}}^2 \quad (\text{A7})$$

Expectation and variance of the sum of  $n$  probability variables sampled from the above infinite population.

$$E\left(\sum_{i=1}^n X_i\right) = n \cdot \mu_{\text{inf}} \quad (\text{A8})$$

$$V\left(\sum_{i=1}^n X_i\right) = n \cdot \sigma_{\text{inf}}^2 \quad (\text{A9})$$

Definition of expectation and variance for a finite population whose size is  $N$ .

$$E(X) = \frac{1}{N} \cdot \sum_{i=1}^N X_i = \mu_{\text{fin}} \quad (\text{A10})$$

$$V(X) = \frac{1}{N} \cdot \sum_{i=1}^N (X_i - \mu_{\text{fin}})^2 = \sigma_{\text{fin}}^2 \quad (\text{A11})$$

When  $n$  samples are sampled from the finite population, "finite population correction" works, and the variance of their sum becomes:

$$V\left(\sum_{i=1}^n X_i\right) = n \cdot \frac{N-n}{N-1} \cdot \sigma_{\text{fin}}^2 \quad (\text{A12})$$

Properties of Poisson distribution  $Po(\lambda)$ , where  $\lambda$  is the arithmetic mean of data.

$$E(Po(\lambda)) = \lambda \quad (A13)$$

$$V(Po(\lambda)) = \lambda \quad (A14)$$

$$Po(\lambda_1) + Po(\lambda_2) = Po(\lambda_1 + \lambda_2) \quad (A15)$$

If a probability variable  $X$  is dependent of a parameter  $Y$ , where  $Y$  is a probability variable, the overall variance  $V(X)$  is described as follows [1].

$$V(X) = E_Y(V_X(X | Y)) + V_Y(E_{X|Y}(X)) \quad (A16)$$

Here,  $X|Y$  means the conditional probability of  $X$  when  $Y$  is given.

## 2. Premises and definitions

The expectation of fluorescent X-ray intensity,  $w$ , can be basically expressed by this equation:

$$w = k \cdot g \cdot d \cdot t, \quad (A17)$$

where  $k$  is a constant,  $g$  is a glancing-angle-dependent term (or the change of the fluorescent X-ray intensity per unit shift of glancing angle),  $d$  is areal density (or concentration) of the analyte element, and  $t$  is integration time. Because fluorescence emission is a Poisson process, the actual fluorescence,  $f$ , includes "counting statistics." Then  $f$  is described as:

$$f = Po(w), \quad (A18)$$

where  $Po$  symbolizes a Poisson distribution whose parameter is  $w$ .

We assume an analyte wafer, and divide the surface into  $N$  regions, as illustrated in Fig. A1. Each point has concentration  $d_i$ , and is measured at a certain glancing angle where the glancing-angle-dependent term is  $g_i$ . We define the following terms that describe statistical properties of  $d_i$  and  $g_i$ .

Expectation of  $g_i$ :

$$E(g_i) = \gamma \quad (A19)$$

Variance of  $g_i$ :

$$V(g_i) = V_g \quad (A20)$$

Expectation of  $d_i$ :

$$E(d_i) = \frac{1}{N} \cdot \sum_{i=1}^N d_i = \delta \quad (A21)$$

Variance of  $d_i$ :

$$V(d_i) = \frac{1}{N} \cdot \sum_{i=1}^N (d_i - \delta)^2 = \sigma_d^2 \quad (\text{A22})$$

Expectation of  $d_i^2$

$$E(d_i^2) = \frac{1}{N} \cdot \sum_{i=1}^N d_i^2 = \Delta = \delta^2 + \sigma_d^2 \quad (\text{A23})$$

Relative standard deviation (RSD) of  $g_i$ :

$$\sqrt{\frac{V_g}{\gamma^2}} = \rho_g \quad (\text{A24})$$

Relative standard deviation (RSD) of  $d_i$ :

$$\sqrt{\frac{\sigma_d^2}{\delta^2}} = \rho_d \quad (\text{A25})$$

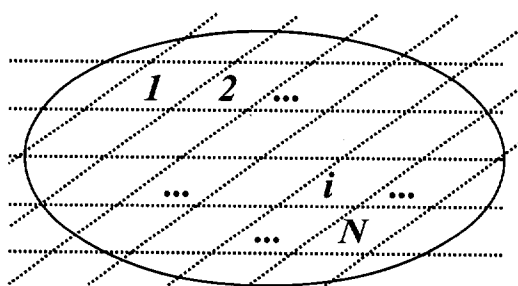

|                                |          |
|--------------------------------|----------|
| Glancing angle for point $i$ : | $g_i$    |
| RSD of Glancing angle:         | $\rho_g$ |
| Concentration of point $i$ :   | $d_i$    |
| RSD of Concentration:          | $\rho_d$ |
| Integration time:              | $t$      |
| Sampling number:               | $n$      |
| Total points:                  | $N$      |

Fig.A1 Schematic illustration of the concept of our theoretical treatment.

### 3. Expectation of the accumulated intensity

For  $\sum_{i=1}^n f_i$  (the sum of  $n$  measured fluorescent X-ray intensities, sampled from a finite population whose size is  $N$ ), its expectation is:

$$\begin{aligned} E\left(\sum_{i=1}^n f_i\right) &= E\left(\sum_{i=1}^n P_o(w_i)\right) \\ &= E\left(P_o\left(\sum_{i=1}^n w_i\right)\right) = E\left(\sum_{i=1}^n w_i\right) = E\left(\sum_{i=1}^n k \cdot g_i \cdot d_i \cdot t\right) = n \cdot k \cdot \gamma \cdot \delta \cdot t. \end{aligned} \quad (\text{A26})$$

### 4. Variance of the accumulated intensity

For the fluorescent X-ray intensity of point  $i$ ,  $f_i$ , its variance is as follows by applying Eq. (A16).

4

$$\begin{aligned}
V(f_i) &= E_{w_i}(V_{f_i}(f_i | w_i)) + V_{w_i}(E_{f_i|w_i}(f_i)) \\
&= E(w_i) + V(w_i) \\
&= E(k \cdot g_i \cdot d_i \cdot t) + V(k \cdot g_i \cdot d_i \cdot t) \\
&= k \cdot t \cdot E(g_i \cdot d_i) + k^2 \cdot t^2 \cdot V(g_i \cdot d_i) \\
&= k \cdot \gamma \cdot \delta \cdot t + k^2 \cdot t^2 \cdot V(g_i \cdot d_i)
\end{aligned} \tag{A27}$$

For  $\sum_{i=1}^n f_i$  (the sum of  $n$  measured fluorescent X-ray intensities, sampled from a finite population whose size is  $N$ ), its variance is:

$$\begin{aligned}
V\left(\sum_{i=1}^n f_i\right) &= \sum_{i=1}^n V(f_i) = \sum_{i=1}^n (k \cdot \gamma \cdot \delta \cdot t + k^2 \cdot t^2 \cdot V(g_i \cdot d_i)) \\
&= n \cdot k \cdot \gamma \cdot \delta \cdot t + k^2 \cdot t^2 \cdot \sum_{i=1}^n V(g_i \cdot d_i) \\
&= n \cdot k \cdot \gamma \cdot \delta \cdot t + k^2 \cdot t^2 \cdot V\left(\sum_{i=1}^n g_i \cdot d_i\right).
\end{aligned} \tag{A28}$$

Because  $\sum_{i=1}^n g_i \cdot d_i$  is defined for  $n$   $d_i$ s sampled from a finite population whose size is  $N$ ,

$\sum_{i=1}^n g_i \cdot d_i$  is a probability variable. We define  $\sum_{i=1}^n g_i \cdot d_i = Y$ , and applying Eq. (A16) yields:

$$V(Y) = E_{d_i}(V_Y(Y | d_i)) + V_{d_i}(E_{Y|d_i}(Y)). \tag{A29}$$

The variance included in the first term of the right side of Eq. (A29) becomes:

$$\begin{aligned}
V_Y(Y | d_i) &= V_Y(g_1 \cdot d_1 + g_2 \cdot d_2 + \dots + g_n \cdot d_n | d_i) \\
&= d_1^2 \cdot V(g_1) + d_2^2 \cdot V(g_2) + \dots + d_n^2 \cdot V(g_n) \\
&= (d_1^2 + d_2^2 + \dots + d_n^2) \cdot V_g.
\end{aligned} \tag{A30}$$

Hence the first term of the right side of Eq. (A29) is:

$$\begin{aligned}
E_{d_i}(V_Y(Y | d_i)) &= E_{d_i}((d_1^2 + d_2^2 + \dots + d_n^2) \cdot V_g) \\
&= V_g \cdot E_{d_i}(d_1^2 + d_2^2 + \dots + d_n^2)
\end{aligned}$$

$$\begin{aligned}
&= V_g \cdot (E_{d_1}(d_1^2) + E_{d_2}(d_2^2) + \dots + E_{d_n}(d_n^2)) \\
&= n \cdot \Delta \cdot V_g.
\end{aligned} \tag{A31}$$

Next, the expectation included in the second term of the right side of Eq. (A29) becomes:

$$\begin{aligned}
E_{Y|d_i}(Y) &= E_{Y|d_i}(g_1 \cdot d_1 + g_2 \cdot d_2 + \dots + g_n \cdot d_n) \\
&= d_1 \cdot E(g_1) + d_2 \cdot E(g_2) + \dots + d_n \cdot E(g_n) \\
&= (d_1 + d_2 + \dots + d_n) \cdot \gamma.
\end{aligned} \tag{A32}$$

Therefore, the second term of the right side of Eq. (A29) is:

$$\begin{aligned}
V_{d_i}(E_{Y|d_i}(Y)) &= V_{d_i}((d_1 + d_2 + \dots + d_n) \cdot \gamma) \\
&= \gamma^2 \cdot (V(d_1) + V(d_2) + \dots + V(d_n)).
\end{aligned} \tag{A33}$$

Because each  $d_i$  is sampled from a finite population, “finite population correction” must be applied to Eq. (A33), yielding:

$$V_{d_i}(E_{Y|d_i}(Y)) = n \cdot \frac{N-n}{N-1} \cdot \gamma^2 \cdot \sigma_d^2. \tag{A34}$$

From Eqs. (A31) and (A34), Eq. (A29) becomes:

$$\sum_{i=1}^n (V(g_i \cdot d_i)) = n \cdot V_g \cdot \Delta + n \cdot \frac{N-n}{N-1} \cdot \gamma^2 \cdot \sigma_d^2. \tag{A35}$$

By applying Eq. (A35) to Eq. (A28), we obtain:

$$V(X) = n \cdot k \cdot \gamma \cdot \delta \cdot t + n \cdot k^2 \cdot V_g \cdot \Delta \cdot t^2 + n \cdot \frac{N-n}{N-1} \cdot k^2 \cdot \gamma^2 \cdot \sigma_d^2 \cdot t^2. \tag{A36}$$

## 5. Relative standard deviation (RSD) of the accumulated intensity

By using Eqs. (A26) and (A36), the square of the RSD of the accumulated intensity,  $\rho^2$ , becomes:

$$\begin{aligned}
\rho^2 &= \frac{V(X)}{(E(X))^2} \\
&= \frac{n \cdot k \cdot \gamma \cdot \delta \cdot t + n \cdot k^2 \cdot V_g \cdot \Delta \cdot t^2 + n \cdot \frac{N-n}{N-1} \cdot k^2 \cdot \gamma^2 \cdot \sigma_d^2 \cdot t^2}{n^2 \cdot k^2 \cdot \gamma^2 \cdot \delta^2 \cdot t^2} \\
&= \frac{1}{n \cdot k \cdot \gamma \cdot \delta \cdot t} + \frac{1}{n} \cdot \left( \rho_g^2 \cdot \frac{\Delta}{\delta^2} + n \cdot \frac{N-n}{N-1} \cdot \rho_d^2 \right).
\end{aligned} \tag{A37}$$

6

Since  $\Delta$  is equal to  $\delta^2 + \sigma_d^2$  as defined in Eq. (A23), we can rewrite:

$$\frac{\Delta}{\delta^2} = 1 + \frac{\sigma_d^2}{\delta^2} = 1 + \rho_d^2. \quad (\text{A38})$$

Applying Eq. (A38) to Eq. (A37) yields:

$$\rho^2 = \frac{1}{n \cdot k \cdot \gamma \cdot \delta \cdot t} + \frac{1}{n} \cdot \left\{ \rho_g^2 \cdot (1 + \rho_d^2) + n \cdot \frac{N-n}{N-1} \cdot \rho_d^2 \right\}. \quad (\text{A39})$$

Consequently, the RSD of the fluorescent X-ray intensity,  $\rho$ , is described as follows.

$$\rho = \sqrt{\frac{1}{n \cdot k \cdot \gamma \cdot \delta \cdot t} + \frac{1}{n} \cdot \left\{ \rho_g^2 \cdot (1 + \rho_d^2) + n \cdot \frac{N-n}{N-1} \cdot \rho_d^2 \right\}} \quad (\text{A40})$$

## 6. Range of $1 + \rho_d^2$

Using the definitions of  $\Delta$  and  $\delta$  shown in Eqs. (A21) and (A23), we can transform  $1 + \rho_d^2$  in Eq. (A38) into:

$$1 + \rho_d^2 = \frac{\Delta}{\delta^2} = \frac{\frac{1}{N} \cdot \sum_{i=1}^N d_i^2}{\left( \frac{1}{N} \cdot \sum_{i=1}^N d_i \right)^2} = N \cdot \frac{d_1^2 + d_2^2 + \dots + d_N^2}{(d_1 + d_2 + \dots + d_N)^2}. \quad (\text{A41})$$

Eq. (A41) represents the nonuniformity of analyte distribution, because the value becomes larger as the uniformity of  $d_i$  worsens.

Here, the following inequality is generally valid for  $N$  positive variables  $x_1, x_2, \dots, x_N$ .

$$\frac{1}{N} \leq \frac{x_1^2 + x_2^2 + \dots + x_N^2}{(x_1 + x_2 + \dots + x_N)^2} \leq 1. \quad (\text{A42})$$

By applying this inequality to Eq. (A41), we can determine the range of  $1 + \rho_d^2$  as follows.

$$1 \leq 1 + \rho_d^2 \leq N. \quad (\text{A43})$$

## NOMENCLATURE

|          |                                                  |
|----------|--------------------------------------------------|
| $f$      | fluorescence intensity                           |
| $w$      | expectation of fluorescence intensity            |
| $k$      | proportionality coefficient                      |
| $g$      | glancing angle                                   |
| $\gamma$ | average glancing angle                           |
| $d$      | areal density (concentration) of analyte element |

|          |                                                          |
|----------|----------------------------------------------------------|
| $\delta$ | average areal density (concentration) of analyte element |
| $N$      | number of total measuring points (size of population)    |
| $n$      | number of sampling points (sample size)                  |
| $t$      | integration time of each point                           |
| $\rho$   | relative standard deviation                              |

## REFERENCE

- [1] Miyazawa, K. *"Joho-Kettei Riron Josetsu"* (in Japanese); Iwanami Shoten, Publishers: Tokyo, Japan, 1971.
